# Supplementary material
Source: PubMed Central journal article supplement (PMC4784841)
Supplement: romj028062.ww1_default.pdf [file romj028062.ww1_default.pdf]

## **Appendix Note 1: Calculation of Absolute Event Rates**

We used the method of predictive margins.<sup>1</sup> Specifically, for each person-quarter in the sample, we predicted the probability of the event, both with concurrent warfarin use and without concurrent use. All other variables were held fixed at their actual values in this prediction exercise. The difference in the two probabilities thus represented the predicted effect of concurrent warfarin use, and was averaged across the sample. To limit computational burden, individual-level random effects were evaluated at zero. Adverse event rates per thousand person-years were estimated by multiplying the effect of warfarin use on the event rate per person per quarter by 4 quarters, and then by 1,000 persons.

### **Reference**

1. Graubard BI, Korn EL. Predictive margins with survey data. *Biometrics* 1999;55:652-9.

**Appendix Table 1:**

**ICD-9 Codes Related to Identification of Fall-Related Fracture**

| Description                                                        | ICD-9 Code |
|--------------------------------------------------------------------|------------|
| <i>Fall-related fracture site</i>                                  |            |
| Fracture of vertebral column without mention of spinal cord injury | 805xx      |
| Fracture of vertebral column with spinal cord injury               | 806xx      |
| Fracture of pelvis                                                 | 808xx      |
| Fracture of humerus                                                | 812xx      |
| Fracture of radius and ulna                                        | 813xx      |
| Fracture of carpal bone(s)                                         | 814xx      |
| Fracture of metacarpal bone(s)                                     | 815xx      |
| Fracture of one or more phalanges of hand                          | 816xx      |
| Multiple fractures of hand bones                                   | 817xx      |
| Ill-defined fractures of upper limb                                | 818xx      |
| Fracture of neck of femur                                          | 820xx      |
| Fracture of other and unspecified parts of femur                   | 821xx      |
| Fracture of patella                                                | 822xx      |
| Fracture of tibia and fibula                                       | 823xx      |
| Fracture of ankle                                                  | 824xx      |
| Other multiple and ill-defined fractures of lower limb             | 827xx      |
| <i>Fall cause of injury</i>                                        |            |
| Accidental fall on or from stairs or steps                         | E880xx     |
| Accidental fall on or from ladders or scaffolding                  | E881xx     |
| Other accidental falls from one level to another                   | E884xx     |
| Accidental fall on same level from slipping tripping or stumbling  | E885xx     |
| Other and unspecified fall                                         | E888xx     |

Notes: Based on Johnston et al. (2012). Fall-related fractures in Figure 5 were defined by a diagnosis of one of these fracture codes, without having an external cause of injury code other than the fall causes listed.

**Appendix Table 2: Odds ratios for hypoglycemia hospitalization or ED visit,  
complete results**

| <i>Covariate</i>                                           | <i>Odds ratio (95% CI)</i>  |
|------------------------------------------------------------|-----------------------------|
| Constant                                                   | 6.81E-6 (3.61E-6 - 1.29E-5) |
| Warfarin use                                               | 1.22 (1.04 - 1.42)          |
| Age                                                        | 1.01 (1.01 - 1.02)          |
| Female                                                     | 1.34 (1.21 - 1.49)          |
| Non-white race / ethnicity                                 | 1.69 (1.53 - 1.87)          |
| Acute myocardial infarction or ischemic heart disease      | 1.20 (1.06 - 1.35)          |
| Alzheimer's disease or dementia                            | 1.82 (1.63 - 2.03)          |
| Asthma                                                     | 0.85 (0.74 - 0.97)          |
| Atrial fibrillation                                        | 0.96 (0.84 - 1.10)          |
| Cancer (breast, colorectal, endometrial, lung or prostate) | 0.92 (0.80 - 1.05)          |
| Chronic kidney disease                                     | 1.91 (1.73 - 2.10)          |
| Chronic obstructive pulmonary disease                      | 1.33 (1.20 - 1.48)          |
| Congestive heart failure                                   | 1.45 (1.30 - 1.62)          |
| Depression                                                 | 1.15 (1.04 - 1.27)          |
| Dyslipidemia                                               | 0.91 (0.79 - 1.04)          |
| Hypertension                                               | 1.39 (1.05 - 1.84)          |
| Osteoporosis                                               | 1.05 (0.93 - 1.18)          |
| Rheumatoid / Osteoarthritis                                | 1.14 (1.03 - 1.26)          |
| Stroke / TIA                                               | 1.29 (1.16 - 1.44)          |
| $\sigma$                                                   | 1.93 (1.80 - 2.06)          |
| $\sigma^2/(\sigma^2+\theta^2)$                             | 0.53 (0.50 - 0.56)          |
| <i>Other Statistics</i>                                    |                             |
| Person-quarters, n                                         | 4,355,418                   |
| Persons, n                                                 | 465,918                     |
| Log likelihood value                                       | -18039.44                   |

Notes: Age and comorbidities are measured as of beginning of each calendar-quarter analyzed.  $\sigma$  is the standard deviation of beneficiary-level random effects;  $\theta$  is the standard deviation of the idiosyncratic disturbance. Results correspond to *ED visit or admission, adjusted* in Figure 1.

**Appendix Table 3:**

**Utilization of other diabetes medications**

| <i>Other medication \ Person-quarters, n (%)</i> | <i>Full sample<br/>(n=4355418)</i> | <i>Person-quarters<br/>with warfarin use<br/>(n=416479)</i> | <i>Person-quarters<br/>without<br/>warfarin use<br/>(n=3938939)</i> | <i>p value</i> |
|--------------------------------------------------|------------------------------------|-------------------------------------------------------------|---------------------------------------------------------------------|----------------|
| Metformin                                        | 1827689 (41.964%)                  | 137884 (33.107%)                                            | 1689805 (42.900%)                                                   | < 0.001        |
| Thiazolidinedione                                | 770041 (17.680%)                   | 51595 (12.388%)                                             | 718446 (18.240%)                                                    | < 0.001        |
| Meglitinide                                      | 46773 (1.074%)                     | 5026 (1.207%)                                               | 41747 (1.060%)                                                      | 0.001          |
| Glyburide                                        | 55805 (1.281%)                     | 4909 (1.179%)                                               | 50896 (1.292%)                                                      | < 0.001        |
| Insulin                                          | 708374 (16.264%)                   | 82536 (19.818%)                                             | 625838 (15.888%)                                                    | < 0.001        |

Note: *Adjusting for use of other diabetes meds sensitivity analysis in Figure 3 adjusts for these medications.*

**Appendix Table 4:**

**Warfarin use concurrent with various diabetes medications**

| <i>Diabetes medication \ Person-quarters, n (%)</i> | <i>Full sample</i> | <i>Person-quarters with warfarin use</i> | <i>Person-quarters without warfarin use</i> |
|-----------------------------------------------------|--------------------|------------------------------------------|---------------------------------------------|
| Glipizide / glimepiride                             | 4355418            | 416479 (9.6%)                            | 3938939 (90.4%)                             |
| Metformin                                           | 2582813            | 167608 (6.5%)                            | 2415205 (93.5%)                             |
| Thiazolidinediones                                  | 7144591            | 522901 (7.3%)                            | 6621690 (92.7%)                             |
| Meglitinides                                        | 4426422            | 479423 (10.8%)                           | 3946999 (89.2%)                             |
| Glyburide                                           | 2215598            | 184317 (8.3%)                            | 2031281 (91.7%)                             |
| Insulin                                             | 330665             | 35759 (10.8%)                            | 294906 (89.2%)                              |

Notes: Adjusted analyses of warfarin use together with metformin, thiazolidinediones, meglitinides, glyburide and insulin are reported in Figure 4. All other tables and figures correspond to primary analysis of glipizide / glimepiride.

**Appendix Figure 1: Odds ratios for hospitalization or ED visit for fall-related fracture and altered consciousness / mental status in person-quarters with concurrent use of warfarin and glipizide / glimepiride, full sample versus person-quarters without hypoglycemia**

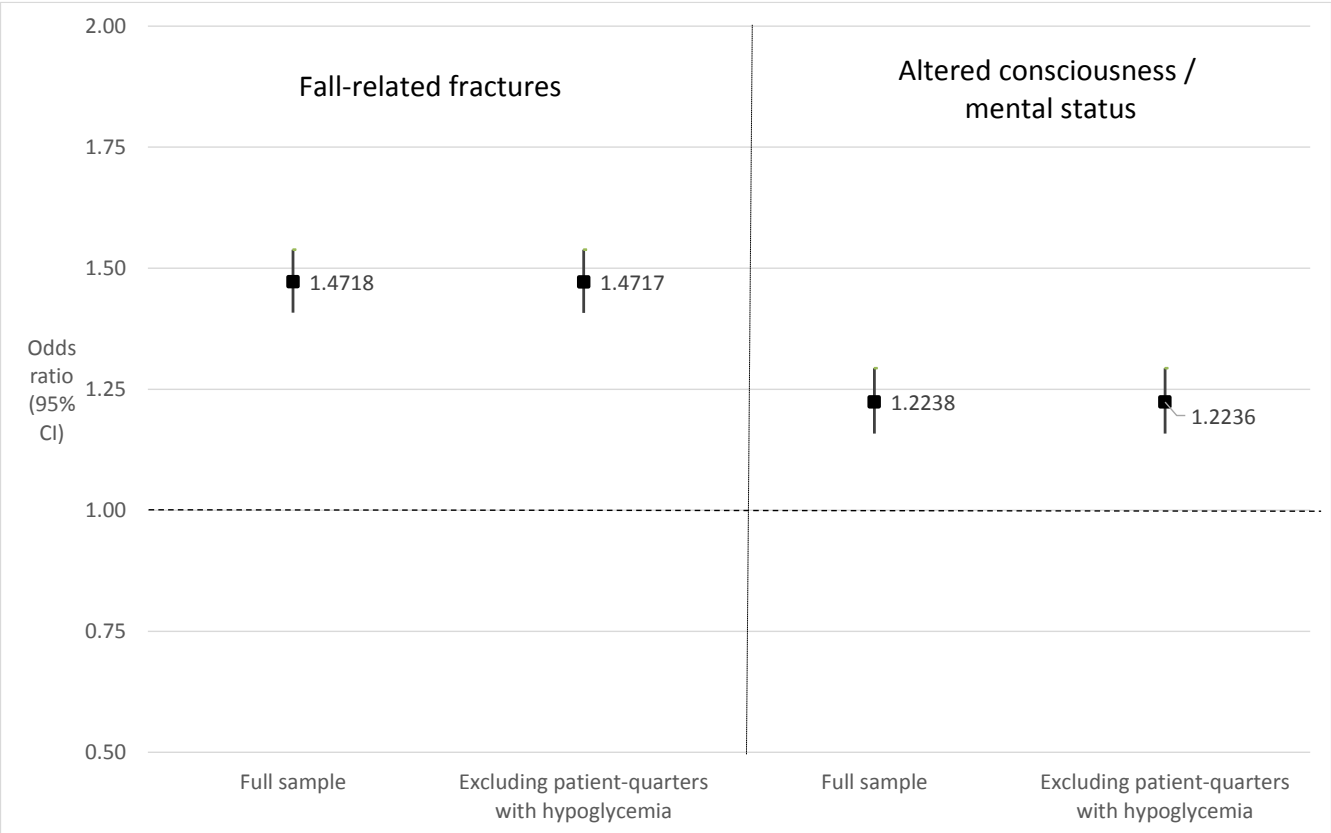

Note: *Full sample* corresponds to Figure 5 and Appendix Table 4.
